# Supplementary material
Source: MDPI journal article supplement (https://www.mdpi.com/2076-3417/13/14/8319)
Supplement: s1 [file s1 › applsci-2480815-supplementary.pdf]

### Supplementary Materials:

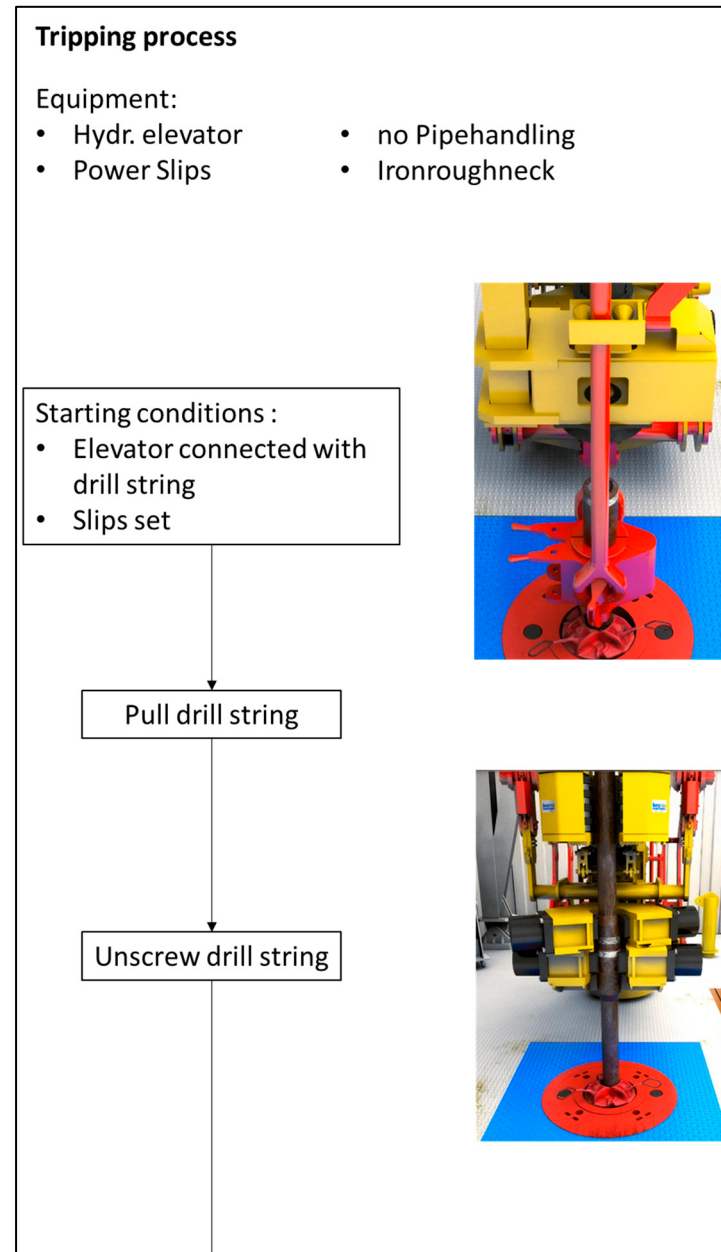

**Figure S1.** Description of the tripping process for the participants.

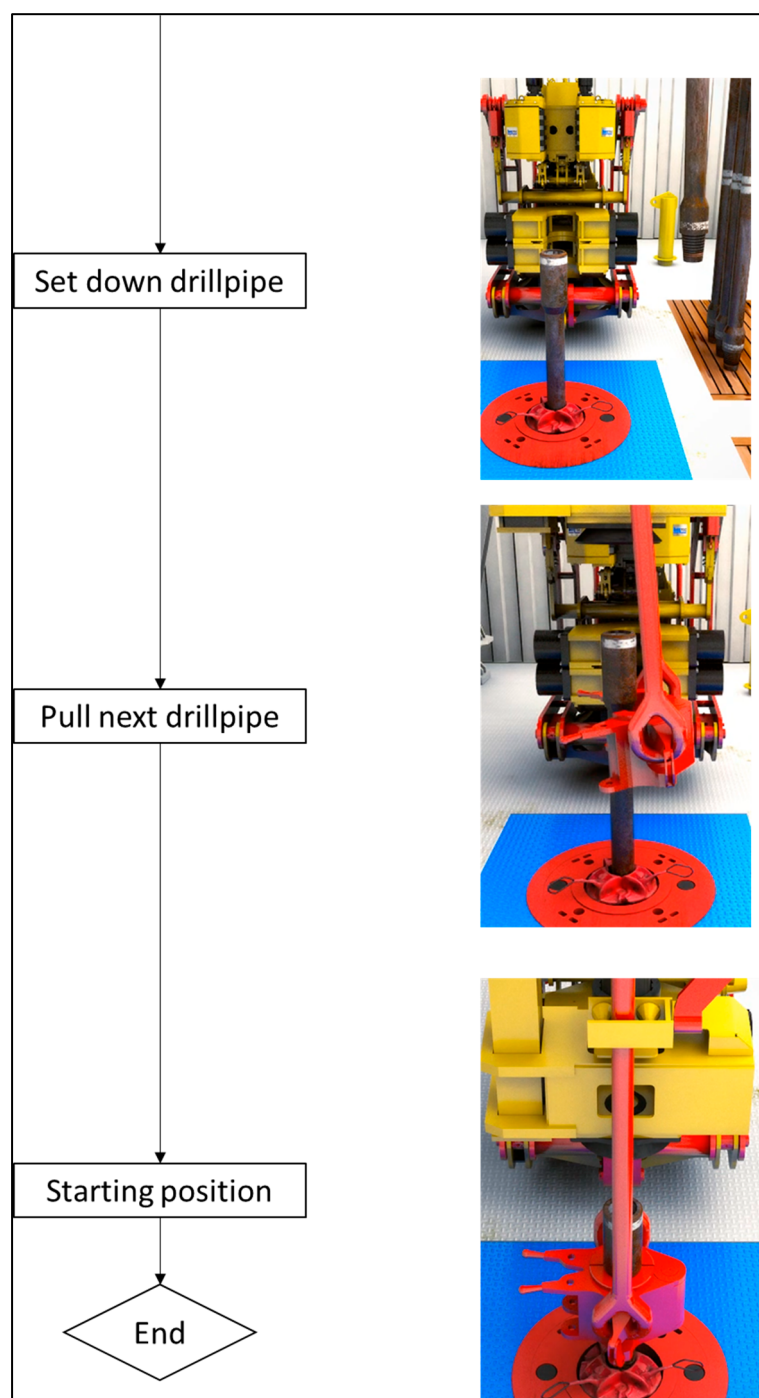

**Figure S2.** Description of the tripping process for the participants.

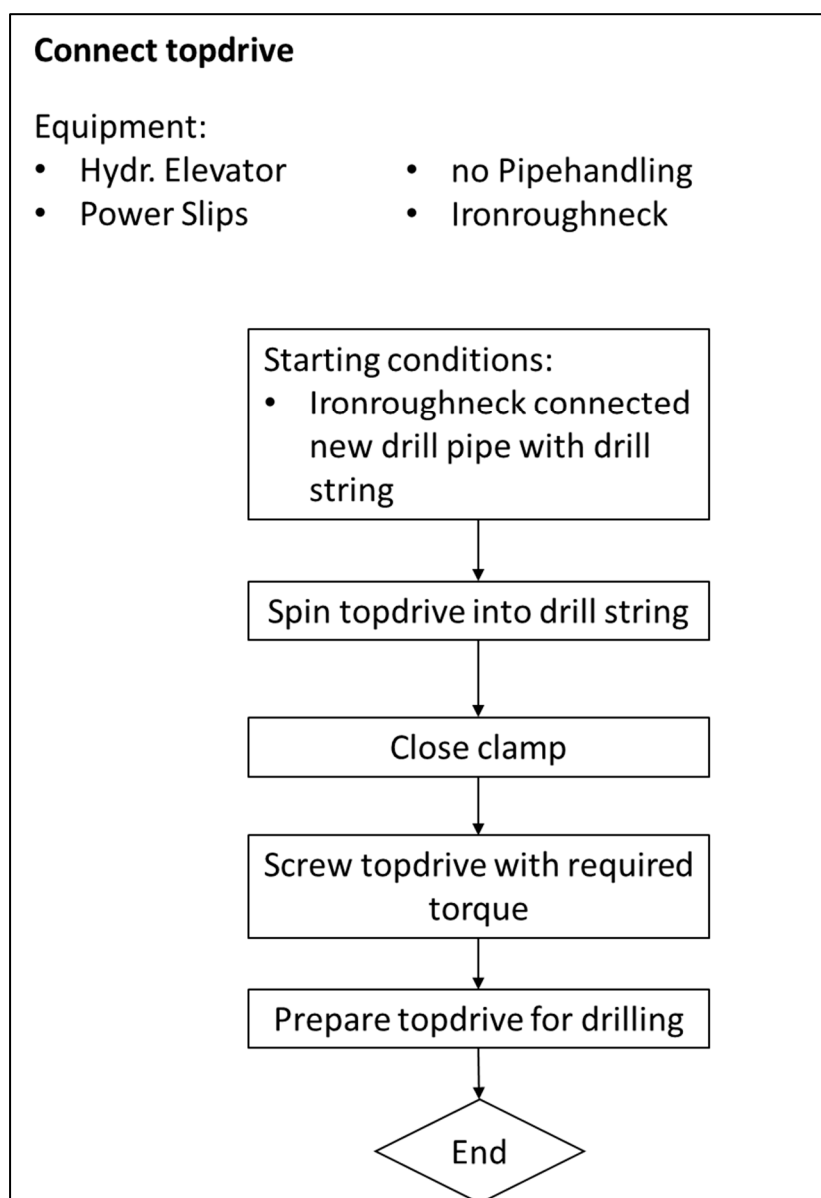

**Figure S3.** Description of the top drive connection process for the participants.

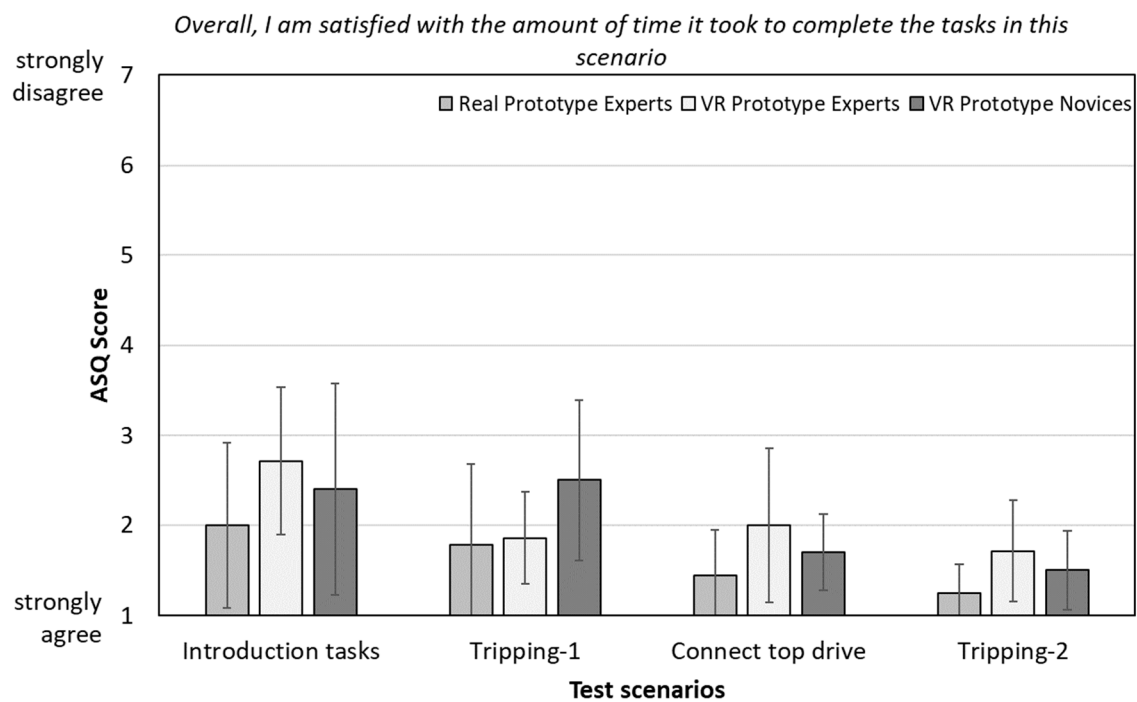

**Figure S4.** Mean ASQ scores for the statement “Overall, I am satisfied with the amount of time it took to complete the tasks in this scenario.”.

| Tasks         |                              | Wizard of Oz | VR Drilling Experts | VR Drilling Novices |
|---------------|------------------------------|--------------|---------------------|---------------------|
| 1             | Log in                       | 94%          | 93%                 | 100%                |
| 2             | Select Tripping              | 94%          | 100%                | 95%                 |
| 3             | Link Tilt teach              | 75%          | 71%                 | 70%                 |
| 5             | Open IBOP                    | 63%          | 57%                 | 35%                 |
| 6             | Change TD rotation direction | 75%          | 86%                 | 95%                 |
| 7             | Open camera monkeyboard      | 100%         | 93%                 | 100%                |
| 8             | Change TD mode               | 81%          | 86%                 | 100%                |
| 9             | Select "Set" key             | 81%          | 93%                 | 80%                 |
| 10            | Operate rotary-push actuator | 69%          | 64%                 | 70%                 |
| 11            | Confirm setting              | 94%          | 71%                 | 95%                 |
| 12            | Open PRW Slips               | 81%          | 71%                 | 65%                 |
| 13            | Extend Link Tilt             | 100%         | 100%                | 95%                 |
| 14            | Activate active float        | 100%         | 79%                 | 80%                 |
| 15            | Open elevator                | 100%         | 100%                | 90%                 |
| 16            | Determine hook position      | 81%          | 100%                | 100%                |
| 17            | Determine hook load          | 81%          | 93%                 | 90%                 |
| 18            | Determine SPP                | 100%         | 100%                | 100%                |
| 19            | Determine elevator status    | 100%         | 100%                | 100%                |
| 20            | Determine Trip-Tank Volume   | 100%         | 100%                | 95%                 |
| <b>Total:</b> |                              | <b>88%</b>   | <b>87%</b>          | <b>87%</b>          |

**Figure S5.** Comparison of success rates for performing the introductory tasks.

| Tasks         |                                    | Real Prototype Experts                                                              |            | VR Prototype Experts                                                                 |            | VR Prototype Novices                                                                  |            |
|---------------|------------------------------------|-------------------------------------------------------------------------------------|------------|--------------------------------------------------------------------------------------|------------|---------------------------------------------------------------------------------------|------------|
| 1             | Pull drill string out of PWR slips | 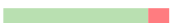   | 88%        | 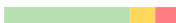   | 79%        | 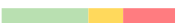   | 60%        |
| 2             | Open PWR slips                     | 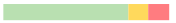   | 81%        | 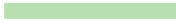   | 100%       | 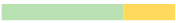   | 85%        |
| 3             | Pull up drill string               | 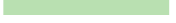   | 100%       | 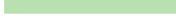   | 100%       | 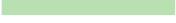   | 100%       |
| 4             | Close PWR slips                    | 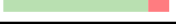   | 88%        | 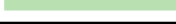   | 100%       | 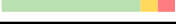   | 85%        |
| 5             | Place drill string into PWR slips  | 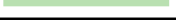   | 100%       | 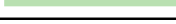   | 100%       | 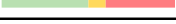   | 55%        |
| 6             | Call up IR menu                    | 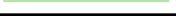   | 100%       | 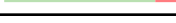   | 86%        | 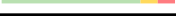   | 85%        |
| 7             | Extend IR                          | 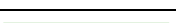   | 94%        | 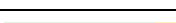   | 100%       | 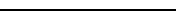   | 100%       |
| 8             | Set IR height                      | 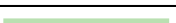   | 100%       | 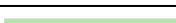   | 93%        | 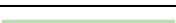   | 85%        |
| 9             | Close button clamp                 | 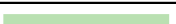   | 100%       | 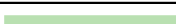   | 100%       | 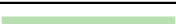   | 100%       |
| 10            | Unscrewing drill string            | 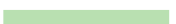   | 100%       | 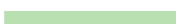   | 100%       | 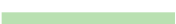   | 100%       |
| 11            | Extend Link Tilt                   | 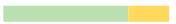   | 100%       | 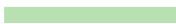   | 100%       | 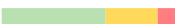   | 100%       |
| 12            | Lower Elevator                     | 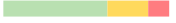   | 88%        | 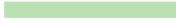   | 100%       | 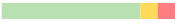   | 75%        |
| 13            | Open Elevator                      | 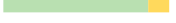   | 75%        | 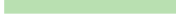   | 100%       | 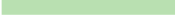   | 85%        |
| 14            | Activate active float              | 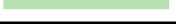   | 94%        | 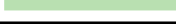   | 100%       | 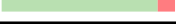   | 100%       |
| 15            | Lower topdrive to rig floor        | 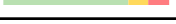   | 100%       | 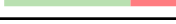   | 100%       | 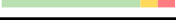   | 90%        |
| 16            | Extend and retract Link Tilt       | 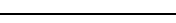   | 81%        | 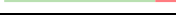   | 71%        | 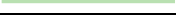   | 85%        |
| 17            | Close Elevator                     | 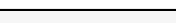 | 100%       |  | 86%        |  | 100%       |
| <b>Total:</b> |                                    | 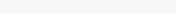 | <b>93%</b> |  | <b>95%</b> |  | <b>88%</b> |

**Figure S6.** Comparison of the success rates in the simulation of the second tripping process.
